# Supplementary material for: Harnessing and storing visible light using a heterojunction of WO3 and CdS for sunlight-free catalysis
Source: Royal Society of Chemistry journal article supplement (doi:10.1039/c6pp00091f), 2016-06-27
Supplement: c6pp00091f1.pdf [file c6pp00091f1.pdf]

## Electronic Supplementary Information

Harnessing and storing visible light using a heterojunction of  $\text{WO}_3$  and CdS for  
sunlight-free catalysis

Seonghun Kim,<sup>a,b</sup> Yiseul Park,<sup>c</sup> Wooyul Kim,<sup>d,\*</sup> and Hyunwoong Park<sup>a,b,\*</sup>

<sup>a</sup>*School of Energy Engineering, Kyungpook National University, Daegu 41566, Korea.*

<sup>b</sup>*School of Architectural, Civil, Environmental, and Energy Engineering, Kyungpook National University, Daegu 41566, Korea.*

<sup>c</sup>*Division of Nano and Energy Convergence Research, DGIST, Daegu 42988, Korea*

<sup>d</sup>*Department of Chemical and Biological Engineering, Sookmyung Women's University, Seoul 04310, Korea.*

\*To whom correspondence should be addressed:

E-mails: [wkim@sookmyung.ac.kr](mailto:wkim@sookmyung.ac.kr) (W. Kim); [hwp@knu.ac.kr](mailto:hwp@knu.ac.kr) (H. Park)

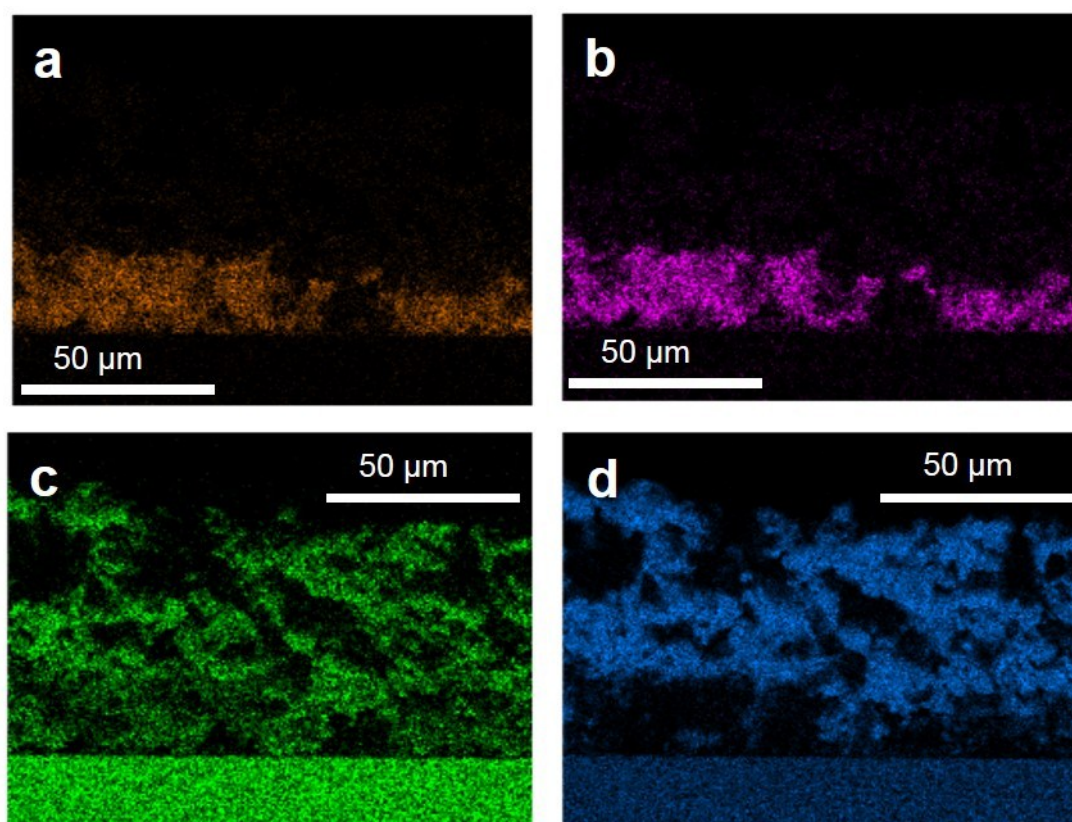

Fig. S1. EDX elemental mapping of CdS/ $\text{WO}_3$  bilayer (cross-sectional view) in Figure 1. a: Cd, b: S, c: O, and d: W.

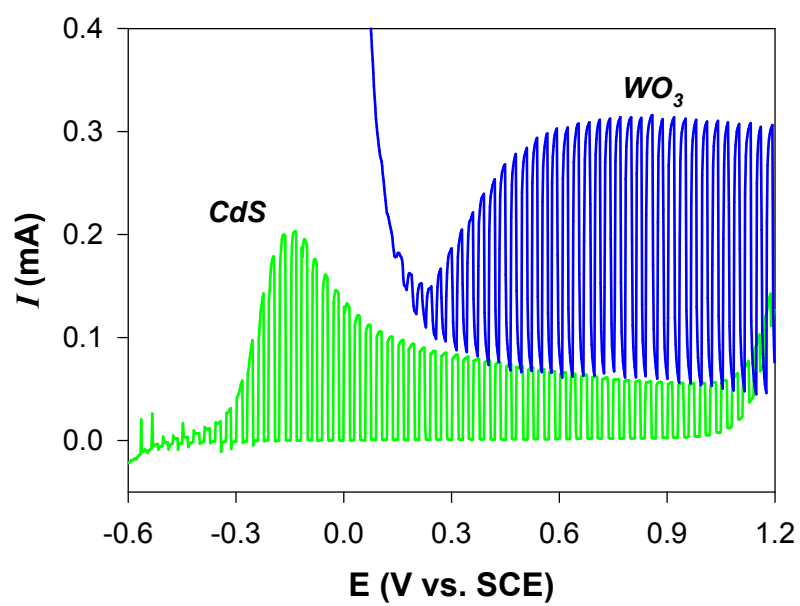

Fig. S2. Light-chopped linear sweep voltammograms of CdS and WO<sub>3</sub> electrodes in 0.1 M sodium sulfate (0.1 M) solution.

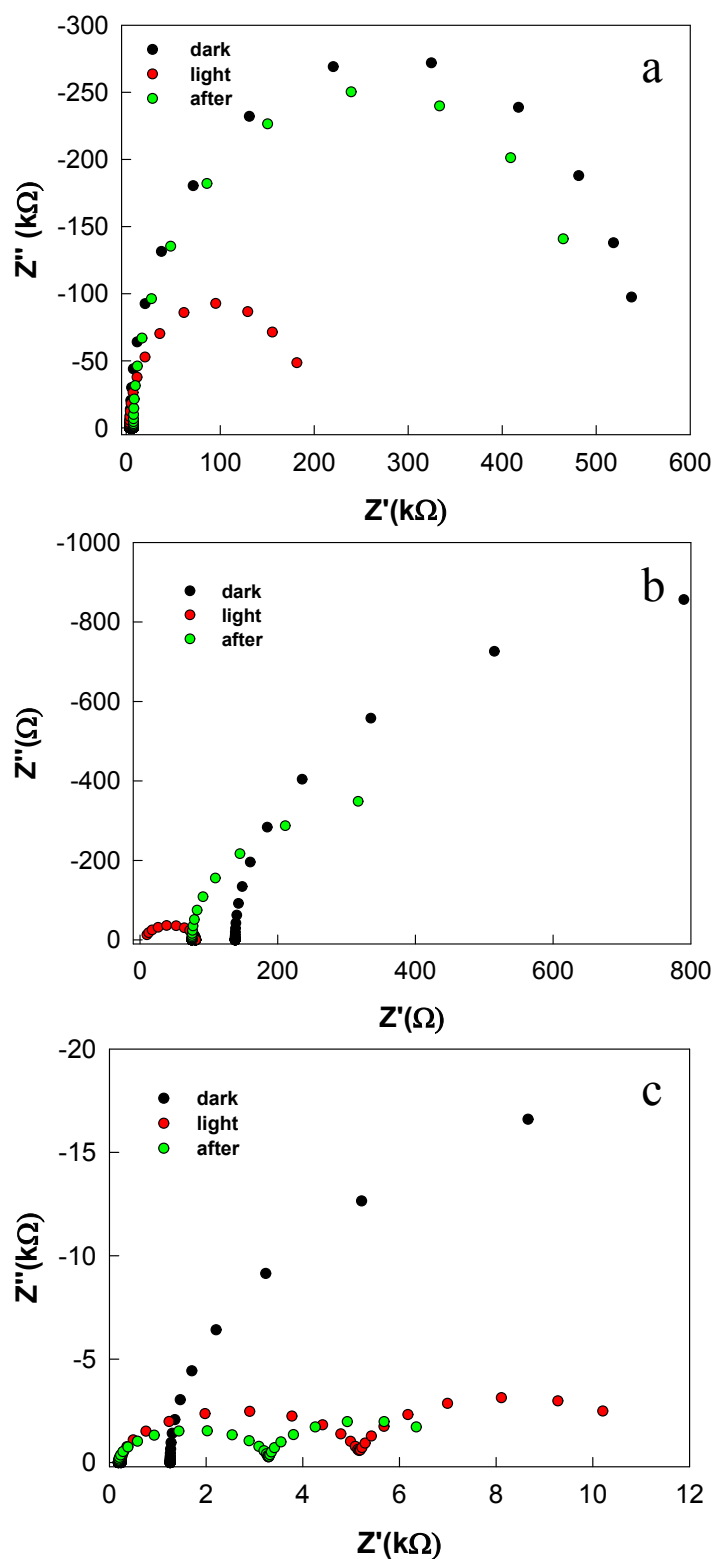

Fig. S3 Nyquist plots of (a) CdS, (b) WO<sub>3</sub> and (c) CdS-WO<sub>3</sub>. The EIS measurements were performed at 0 V vs. SCE in the dark (before illumination; black), under illumination ( $\lambda > 420$  nm, red), and in the dark after 5h-illumination process (green), respectively. The electrodes were immersed in 0.1 M Na<sub>2</sub>SO<sub>4</sub>.
